# Supplementary material
Source: PubMed Central journal article supplement (PMC2443661)
Supplement: M710169200_1.pdf [file M710169200_1.pdf]

SUPPLEMENTARY MATERIALS

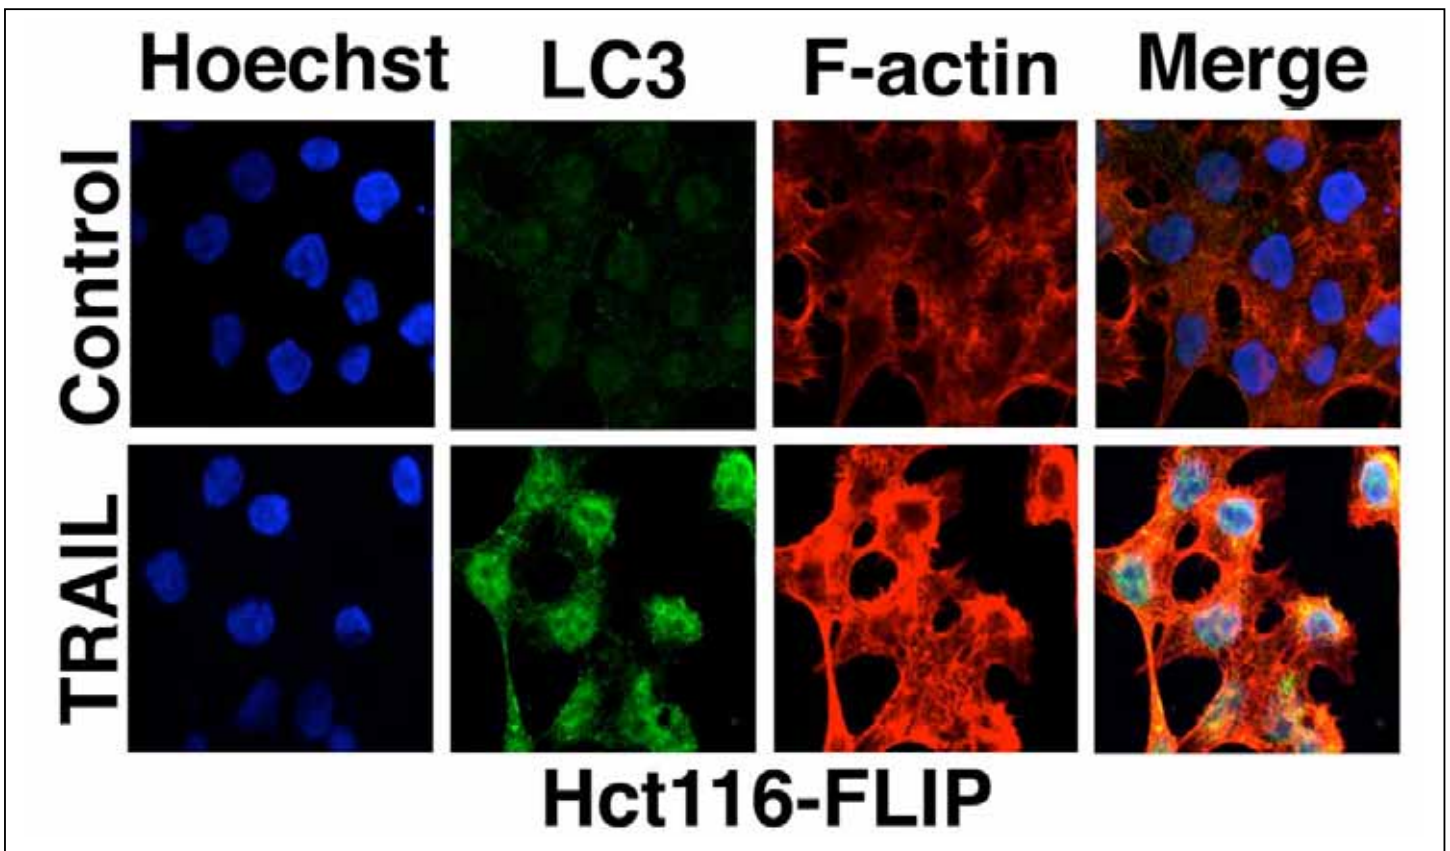

Fig. S1. Increased expression and punctate appearance of endogenous LC3 in TRAIL-treated Hct116 cells stably transfected with FLIP. Hct116-FLIP cells were treated with TRAIL (100 ng/ml, 24 hr) and assessed by confocal microscopy for staining of nuclei (Hoechst), endogenous LC3 (anti-LC3 Ab) and F-actin (rhodamine phalloidine).
